# Supplementary material for: Structural analysis and water adsorption properties of chloranilate anion–terpyridine metal complexes forming hydrogen-bonded frameworks
Source: Royal Society of Chemistry journal article supplement (doi:10.1039/d4ce01214c), 2025-01-01
Supplement: d4ce01214c1.pdf [file d4ce01214c1.pdf]

SUPPORTING INFORMATION

**Structural Analysis and Water Adsorption Properties of  
Chloranilate Anion–Terpyridine Metal Complexes forming  
Hydrogen-Bonded Frameworks**

Akio Mishima,<sup>\*a</sup> Runa Mori,<sup>a</sup> Ken Kanazashi,<sup>a</sup> Tomohiko Hamaguchi,<sup>a</sup> Ryuta Ishikawa<sup>a</sup>  
and Satoshi Kawata<sup>\*a</sup>

*<sup>a</sup> Department of Chemistry, Faculty of Science, Fukuoka University  
Nanakuma, Jonan-ku Fukuoka 814-0180, Japan*

\*Corresponding authors.

E-mails: akio.mishima@fukuoka-u.ac.jp (A. Mishima); kawata@fukuoka-u.ac.jp (S. Kawata)

Table S1 Selected bond distance (Å) and angle (°) for **Fe-A** and **Co-A**.

| <b>Fe-A</b> |       |              |  | <b>Co-A</b> |       |              |  |
|-------------|-------|--------------|--|-------------|-------|--------------|--|
| Atom1       | Atom2 | Distance (Å) |  | Atom1       | Atom2 | Distance (Å) |  |
| Fe01        | N1    | 1.9869(18)   |  | Co1         | N1    | 2.0932(19)   |  |
| Fe01        | N2    | 1.8871(17)   |  | Co1         | N2    | 1.9137(17)   |  |
| Fe01        | N3    | 1.9839(19)   |  | Co1         | N3    | 2.097(2)     |  |
| Fe01        | N4    | 1.9819(18)   |  | Co1         | N4    | 2.0692(19)   |  |
| Fe01        | N5    | 1.8859(16)   |  | Co1         | N5    | 1.8979(17)   |  |
| Fe01        | N6    | 1.9808(18)   |  | Co1         | N6    | 2.0663(19)   |  |

  

| Atom1 | Atom2 | Atom3 | Angle (°) | Atom1 | Atom2 | Atom3 | Angle (°) |
|-------|-------|-------|-----------|-------|-------|-------|-----------|
| N2    | Fe01  | N4    | 101.79(7) | N1    | Co1   | N3    | 159.21(7) |
| N2    | Fe01  | N3    | 80.88(7)  | N2    | Co1   | N4    | 103.02(7) |
| N2    | Fe01  | N1    | 80.81(7)  | N2    | Co1   | N1    | 79.66(7)  |
| N2    | Fe01  | N6    | 96.56(8)  | N2    | Co1   | N6    | 96.86(7)  |
| N3    | Fe01  | N1    | 161.62(7) | N2    | Co1   | N3    | 79.66(7)  |
| N4    | Fe01  | N3    | 90.90(7)  | N4    | Co1   | N1    | 91.78(7)  |
| N4    | Fe01  | N1    | 91.16(7)  | N4    | Co1   | N3    | 90.76(7)  |
| N5    | Fe01  | N2    | 177.50(8) | N5    | Co1   | N2    | 176.88(7) |
| N5    | Fe01  | N4    | 80.69(7)  | N5    | Co1   | N4    | 79.87(7)  |
| N5    | Fe01  | N3    | 98.84(7)  | N5    | Co1   | N1    | 101.53(7) |
| N5    | Fe01  | N1    | 99.53(7)  | N5    | Co1   | N6    | 80.25(7)  |
| N5    | Fe01  | N6    | 80.96(7)  | N5    | Co1   | N3    | 99.23(7)  |
| N6    | Fe01  | N4    | 161.64(7) | N6    | Co1   | N4    | 160.11(7) |
| N6    | Fe01  | N3    | 91.52(8)  | N6    | Co1   | N1    | 92.23(7)  |
| N6    | Fe01  | N1    | 92.26(8)  | N6    | Co1   | N3    | 92.36(8)  |

Table S2 Selected bond distance (Å) and angle (°) for **Fe-B** and **Co-B**.

| <b>Fe-B</b> |       |              |  | <b>Co-B</b> |       |              |  |
|-------------|-------|--------------|--|-------------|-------|--------------|--|
| Atom1       | Atom2 | Distance (Å) |  | Atom1       | Atom2 | Distance (Å) |  |
| Fe01        | N1    | 1.9796(16)   |  | Co1         | N6    | 2.0702(14)   |  |
| Fe01        | N2    | 1.8882(14)   |  | Co1         | N3    | 2.0757(14)   |  |
| Fe01        | N3    | 1.9804(15)   |  | Co1         | N1    | 2.0784(14)   |  |
| Fe01        | N4    | 1.9798(16)   |  | Co1         | N4    | 2.0706(14)   |  |
| Fe01        | N5    | 1.8882(14)   |  | Co1         | N2    | 1.9028(13)   |  |
| Fe01        | N6    | 1.9854(16)   |  | Co1         | N5    | 1.8985(13)   |  |

  

| Atom1 | Atom2 | Atom3 | Angle (°) | Atom1 | Atom2 | Atom3 | Angle (°) |
|-------|-------|-------|-----------|-------|-------|-------|-----------|
| N1    | Fe01  | N3    | 161.93(6) | N2    | Co1   | N6    | 100.97(5) |
| N1    | Fe01  | N6    | 91.94(6)  | N2    | Co1   | N3    | 79.94(6)  |
| N1    | Fe01  | N4    | 91.05(6)  | N2    | Co1   | N1    | 80.18(6)  |
| N2    | Fe01  | N3    | 80.90(6)  | N2    | Co1   | N4    | 98.66(5)  |
| N2    | Fe01  | N6    | 98.08(6)  | N3    | Co1   | N1    | 160.09(5) |
| N2    | Fe01  | N1    | 81.07(6)  | N4    | Co1   | N3    | 91.79(5)  |
| N2    | Fe01  | N4    | 99.95(6)  | N4    | Co1   | N1    | 92.07(5)  |
| N3    | Fe01  | N6    | 91.65(6)  | N5    | Co1   | N6    | 80.16(6)  |
| N4    | Fe01  | N3    | 90.99(6)  | N5    | Co1   | N3    | 101.50(5) |
| N4    | Fe01  | N6    | 161.97(6) | N5    | Co1   | N1    | 98.40(5)  |
| N5    | Fe01  | N3    | 99.87(6)  | N5    | Co1   | N4    | 80.23(6)  |
| N5    | Fe01  | N2    | 178.85(7) | N5    | Co1   | N2    | 178.18(6) |
| N5    | Fe01  | N6    | 81.06(7)  | N6    | Co1   | N3    | 91.48(5)  |
| N5    | Fe01  | N1    | 98.19(6)  | N6    | Co1   | N1    | 91.41(5)  |
| N5    | Fe01  | N4    | 80.91(7)  | N6    | Co1   | N4    | 160.38(5) |

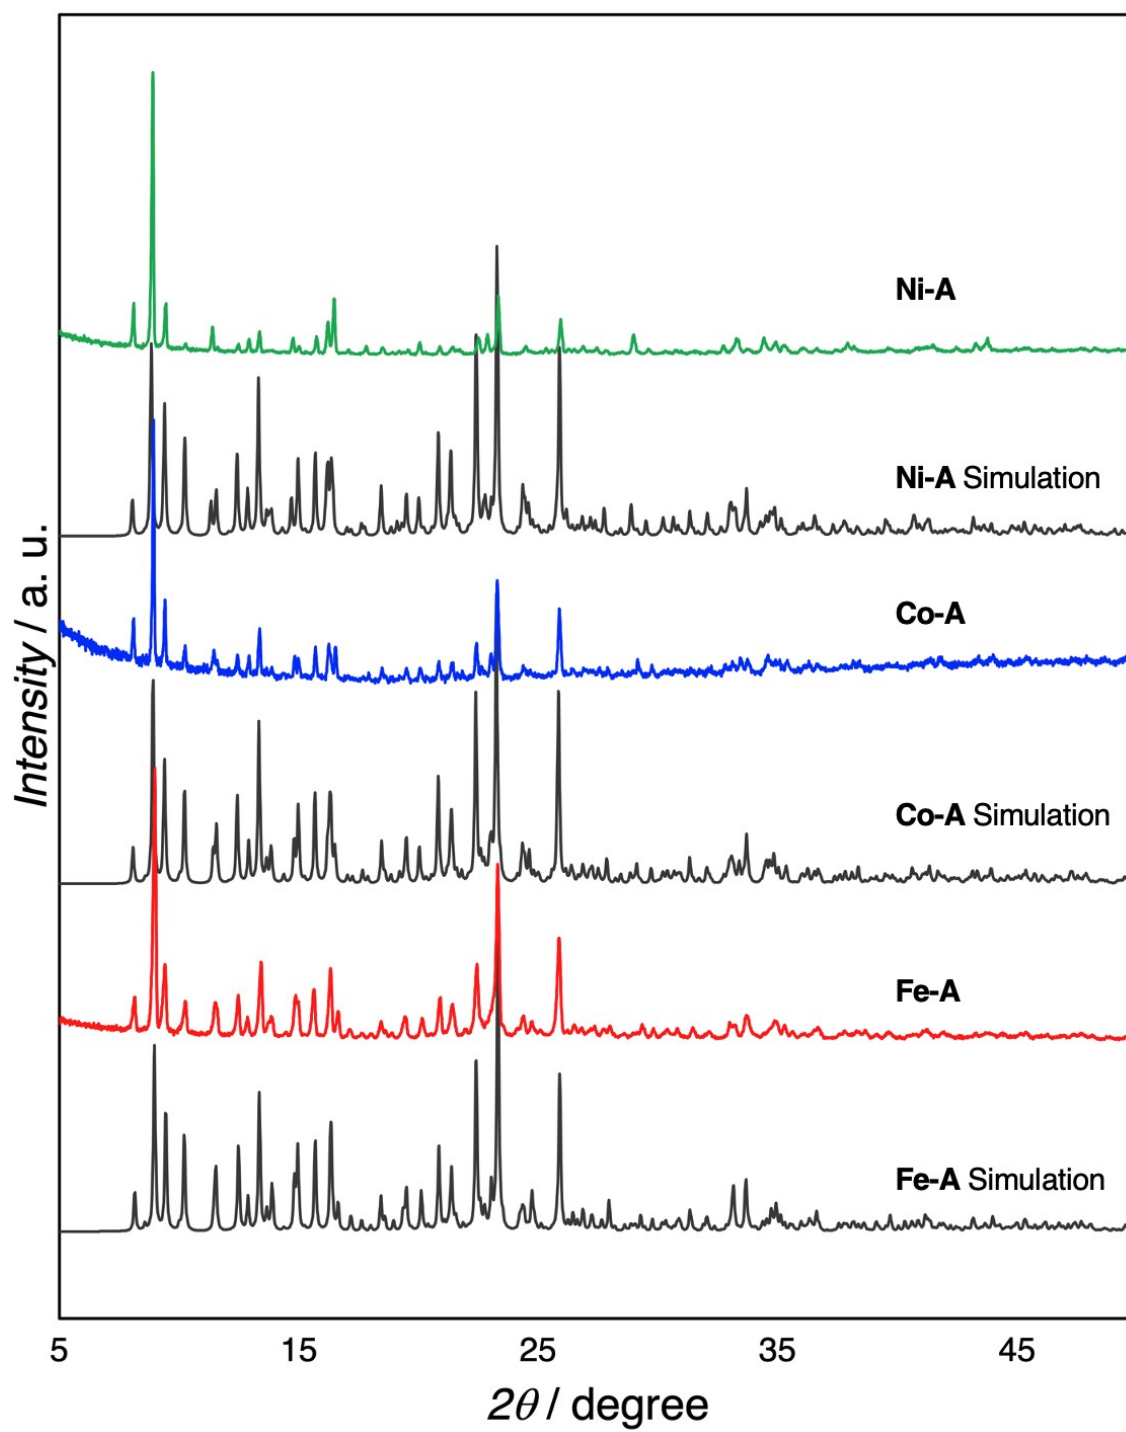

FigS1. PXRD patterns of Fe-A, Co-A and Ni-A.

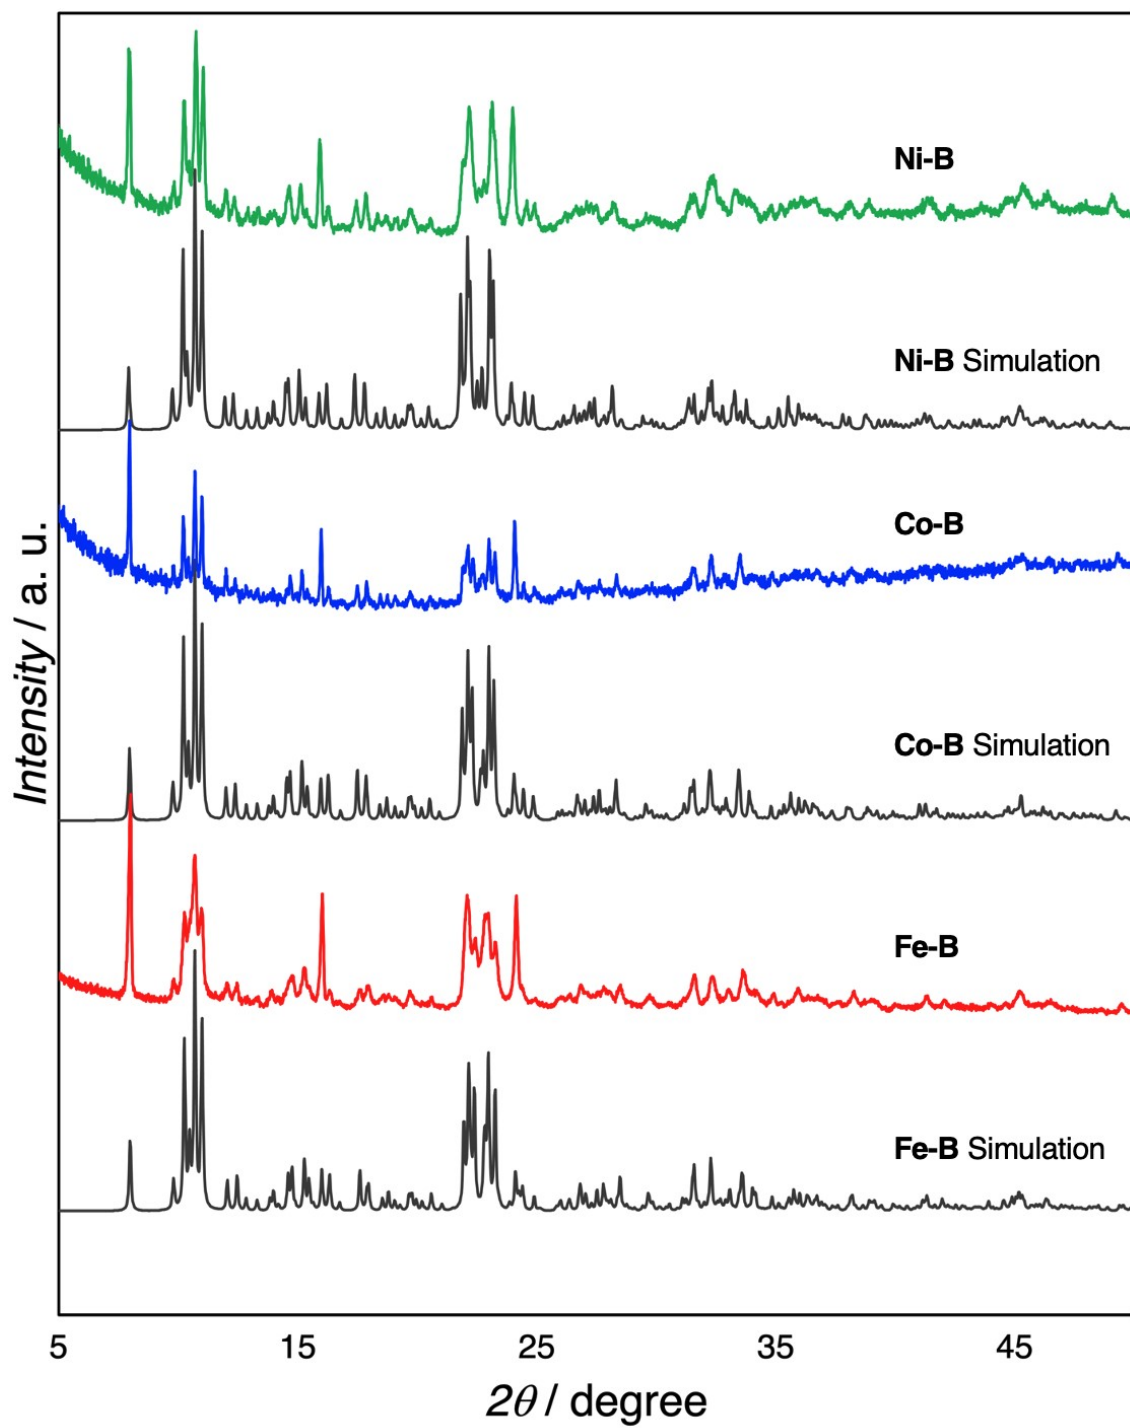

FigS2. PXRD patterns of **Fe-B**, **Co-B** and **Ni-B**.

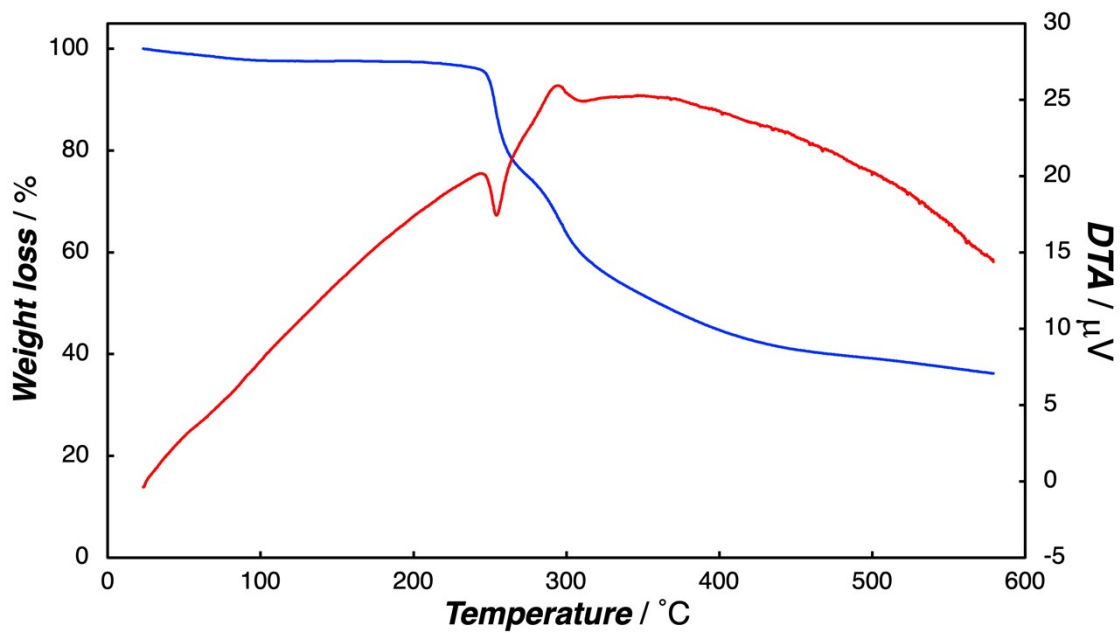

Fig.S3 TGA (bule) and DTA (red) curves of Fe-A.

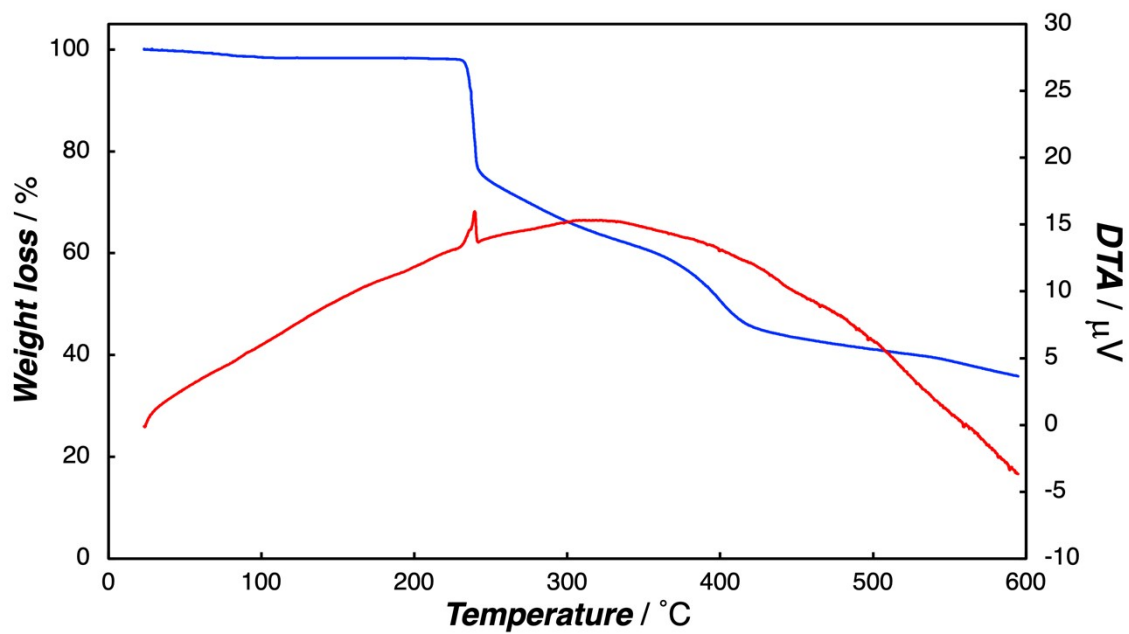

Fig.S4 TGA (bule) and DTA (red) curves of Co-A.

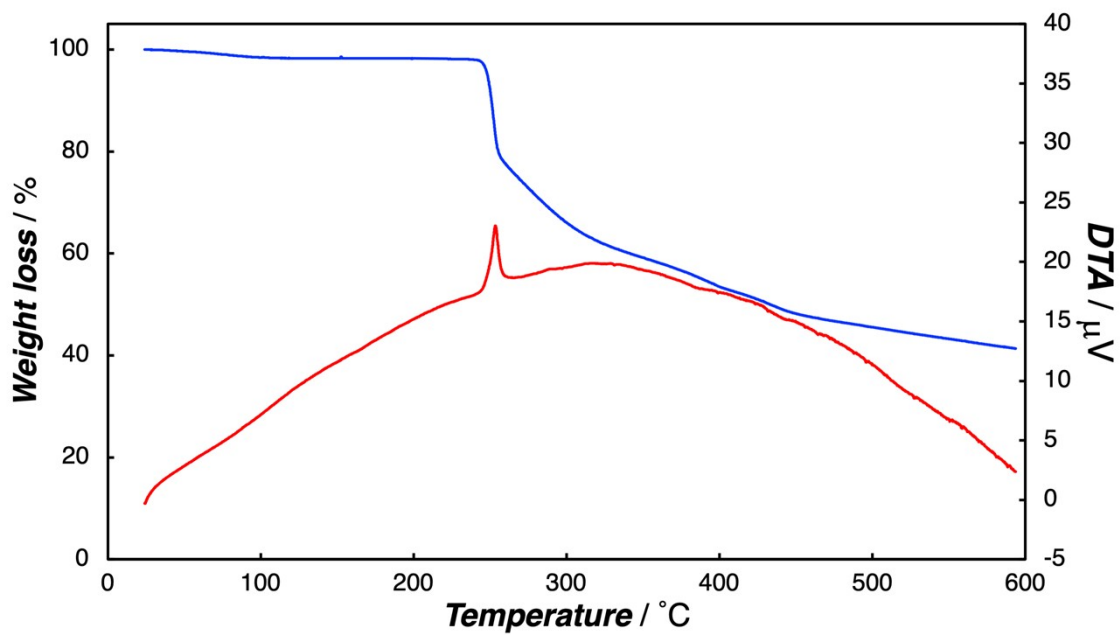

Fig.S5 TGA (bule) and DTA (red) curves of **Ni-A**.

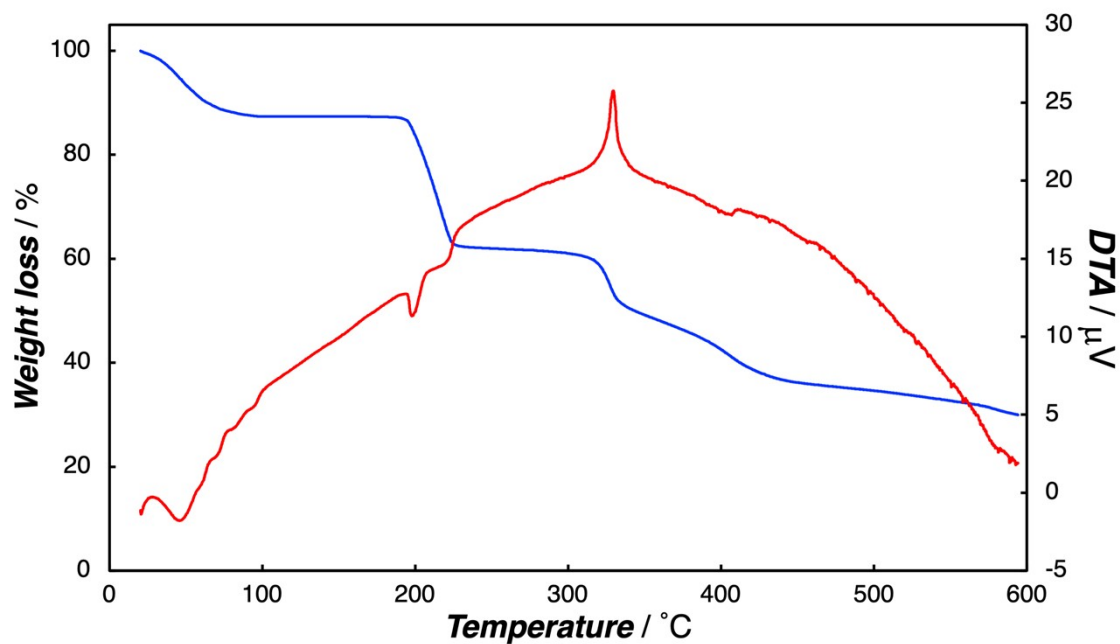

Fig.S6 TGA (bule) and DTA (red) curves of **Fe-B**.

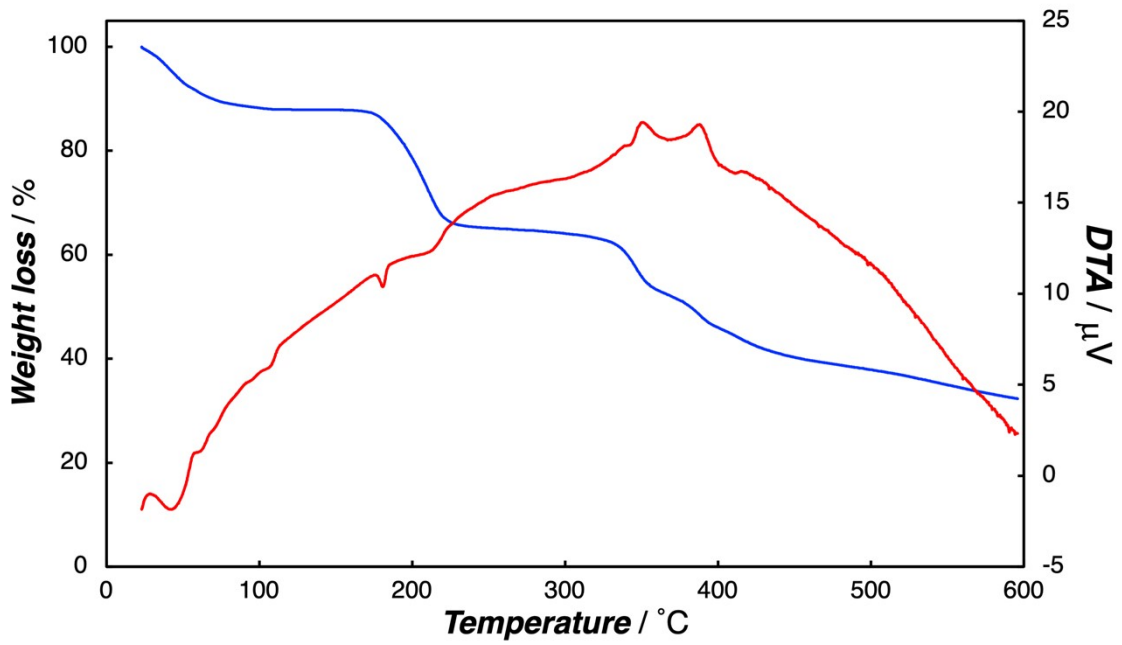

Fig.S7 TGA (bule) and DTA (red) curves of **Co-B**.

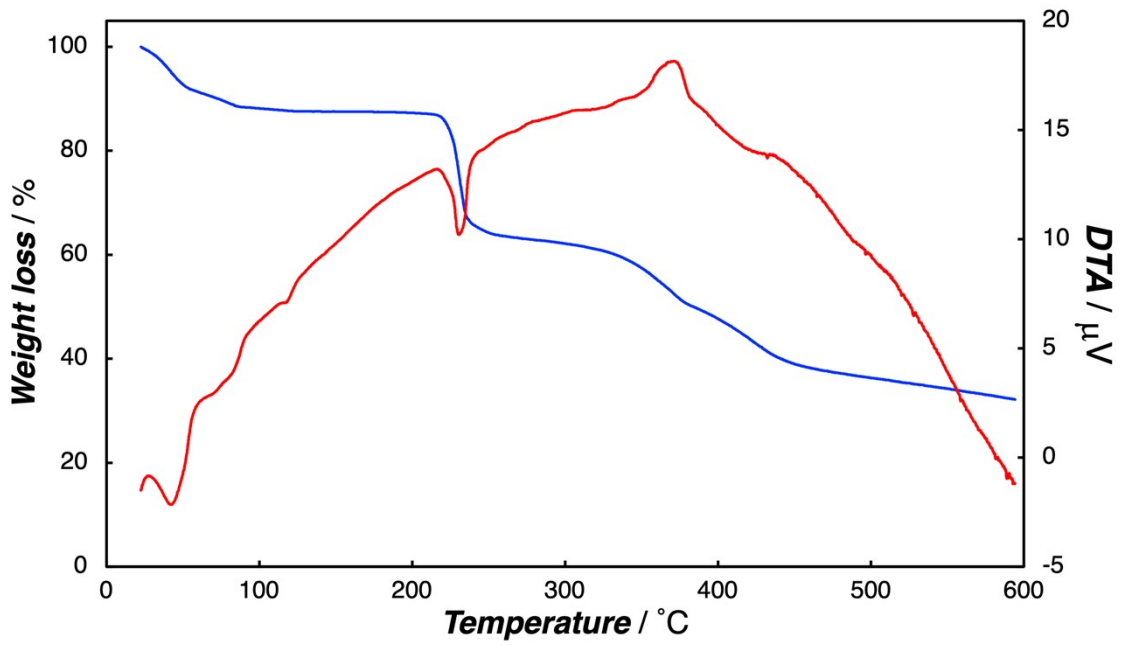

Fig.S8 TGA (bule) and DTA (red) curves of **Ni-B**.



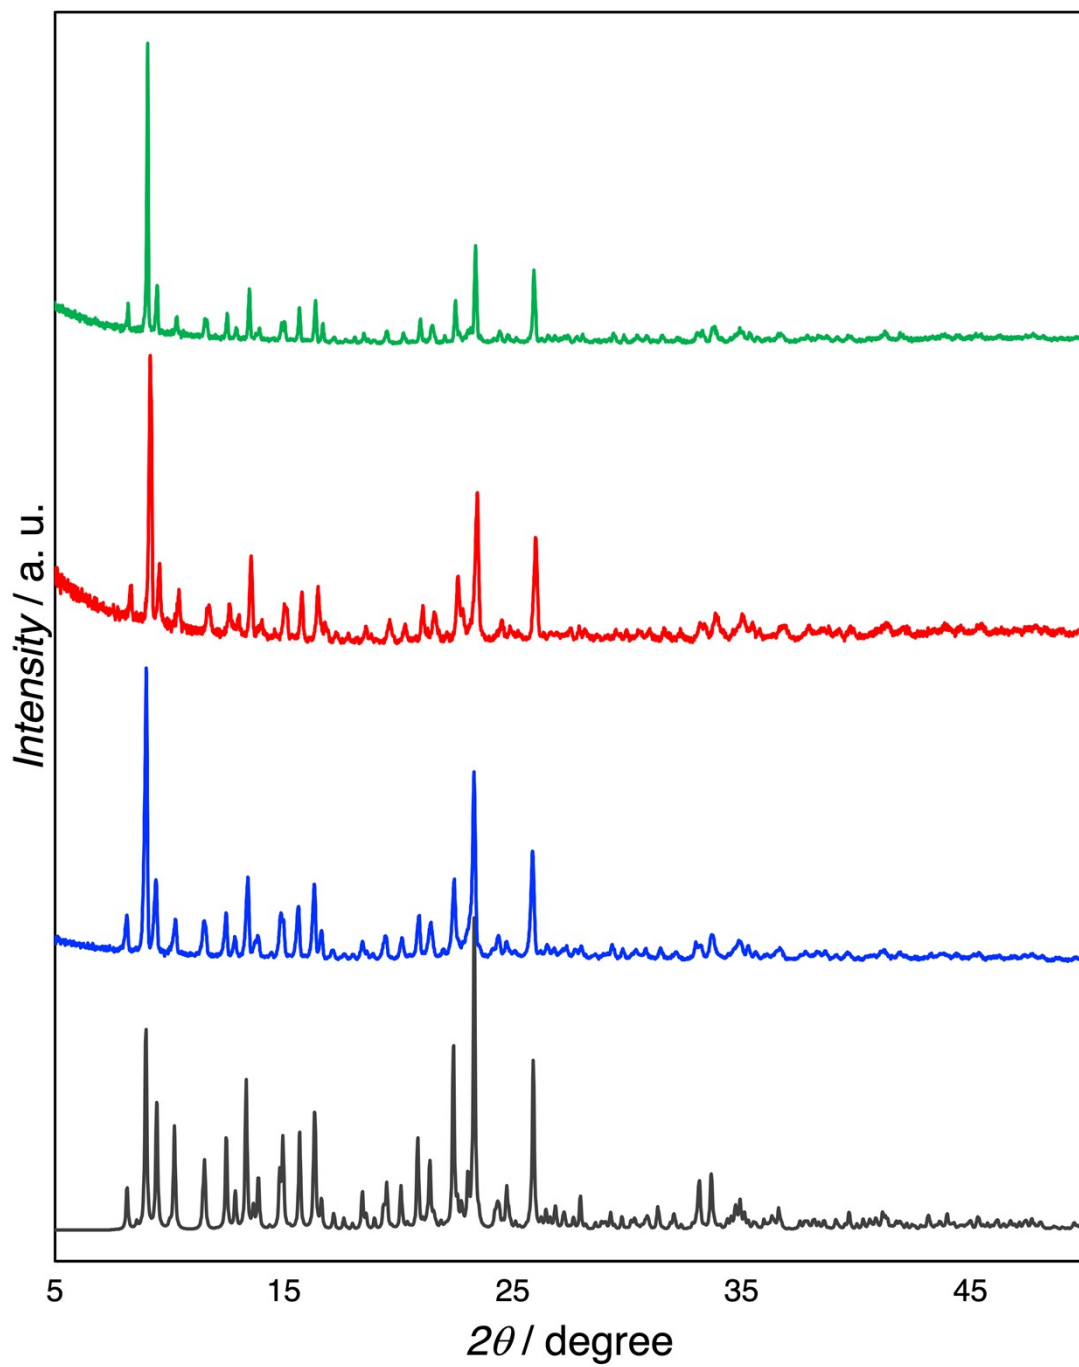

Fig.S9 PXRd patterns of **Fe-A**. Black) simulation from the single crystal, blue) as-synthesis, red) dehydration, green) rehydration.

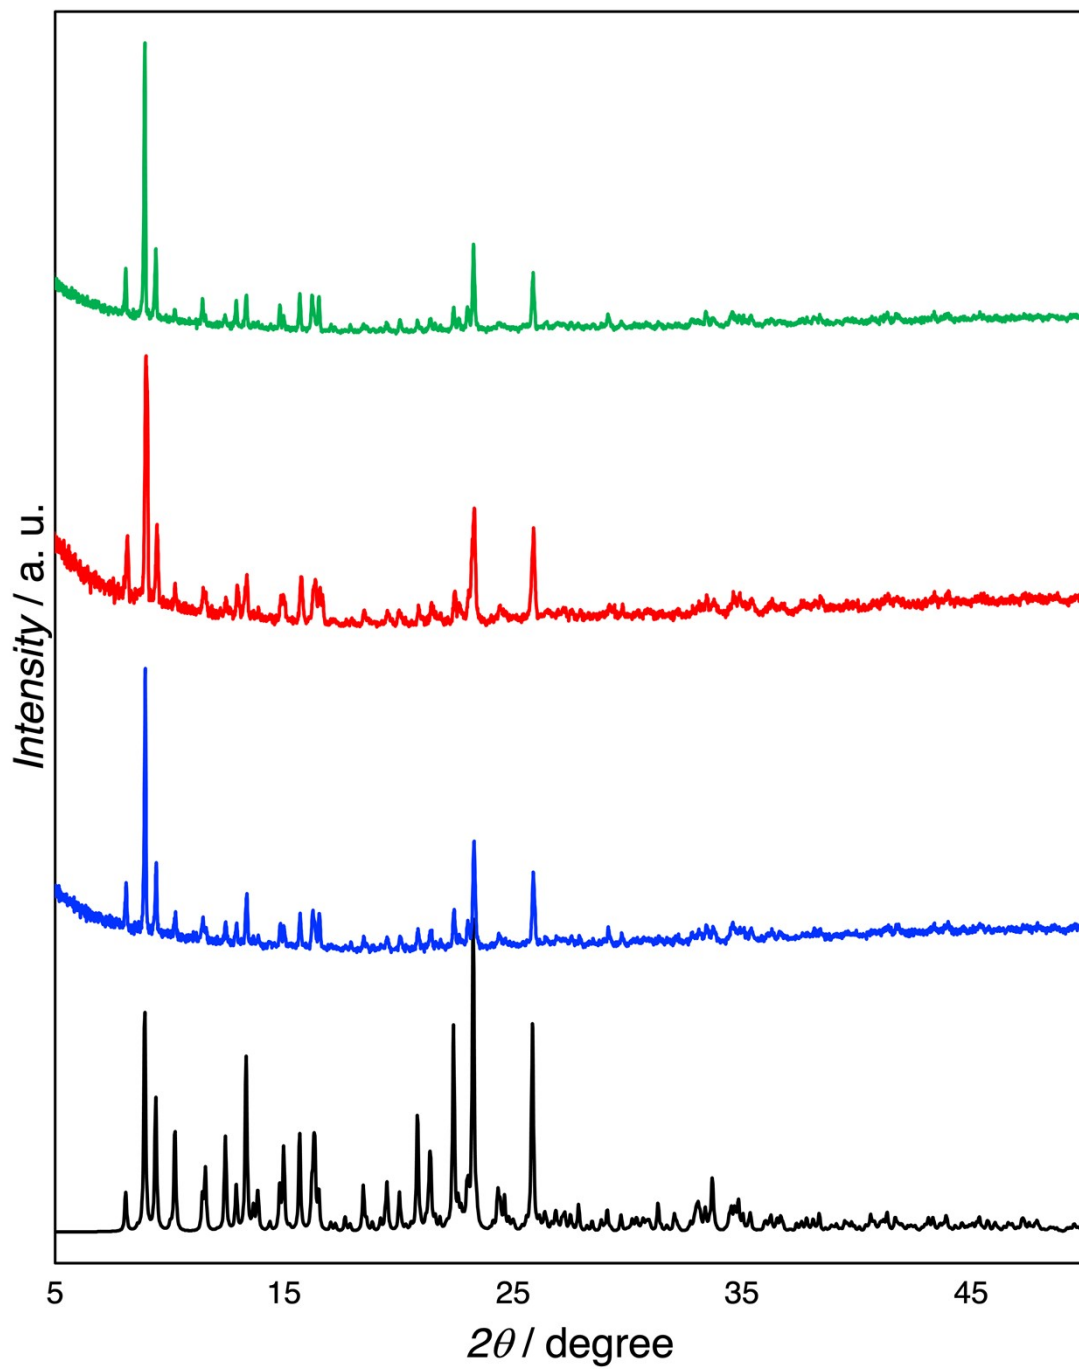

Fig.S10 PXR D patterns of Co-A. Black) simulation from the single crystal, blue) as-synthesis, red) dehydration, green) rehydration.

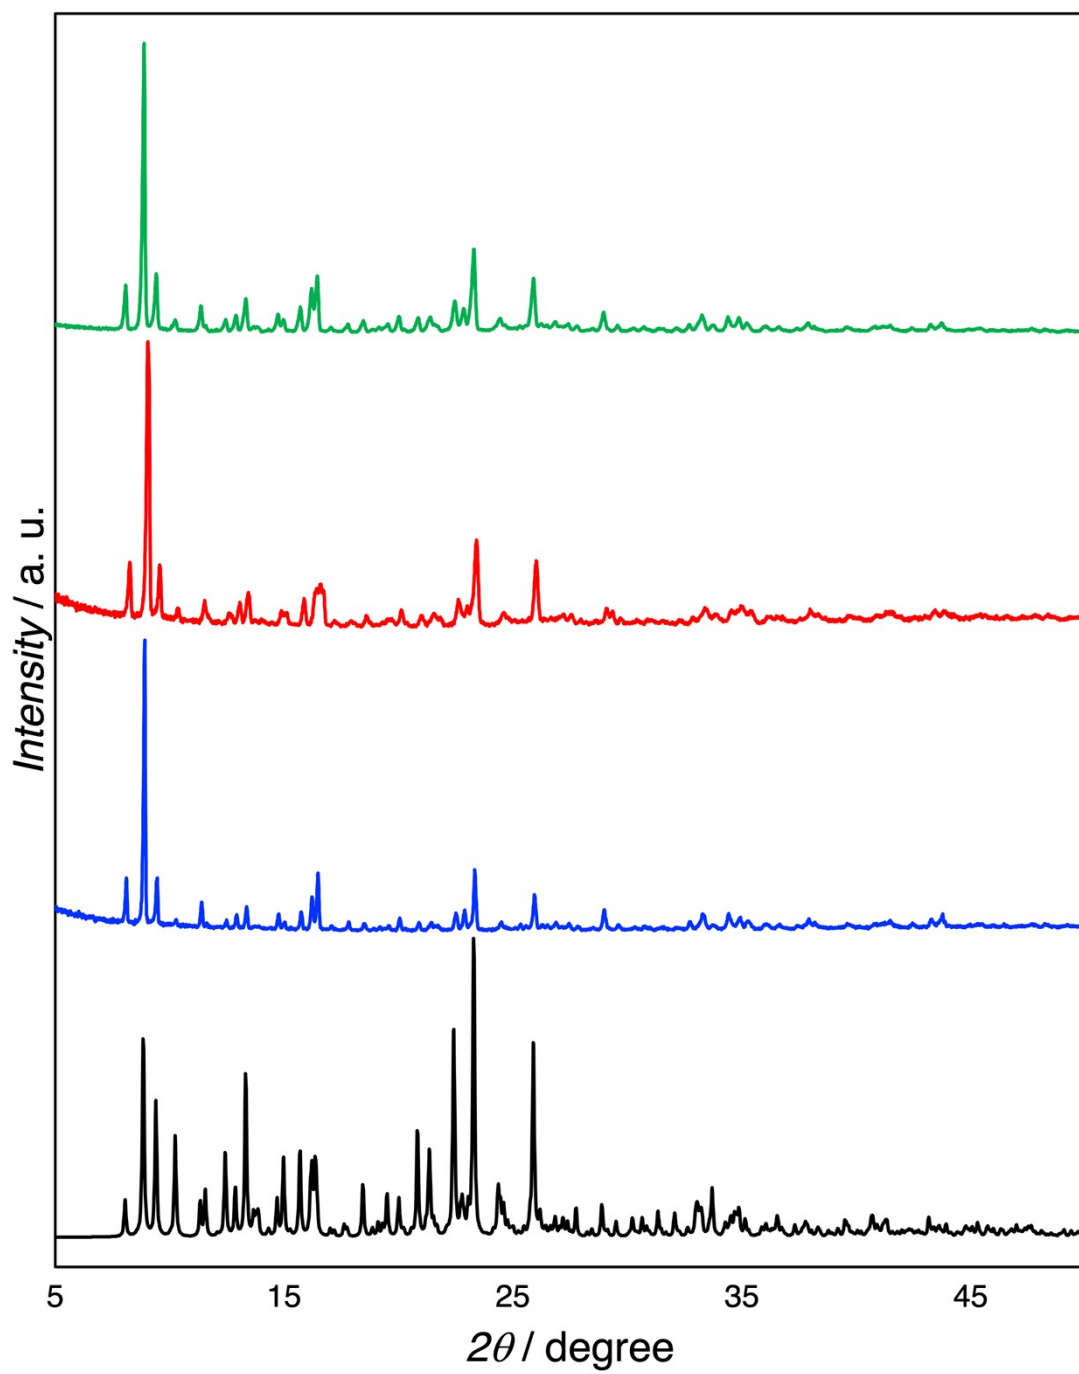

Fig.S11 PXR D patterns of Ni-A. Black) simulation from the single crystal, blue) as-synthesis, red) dehydration, green) rehydration.

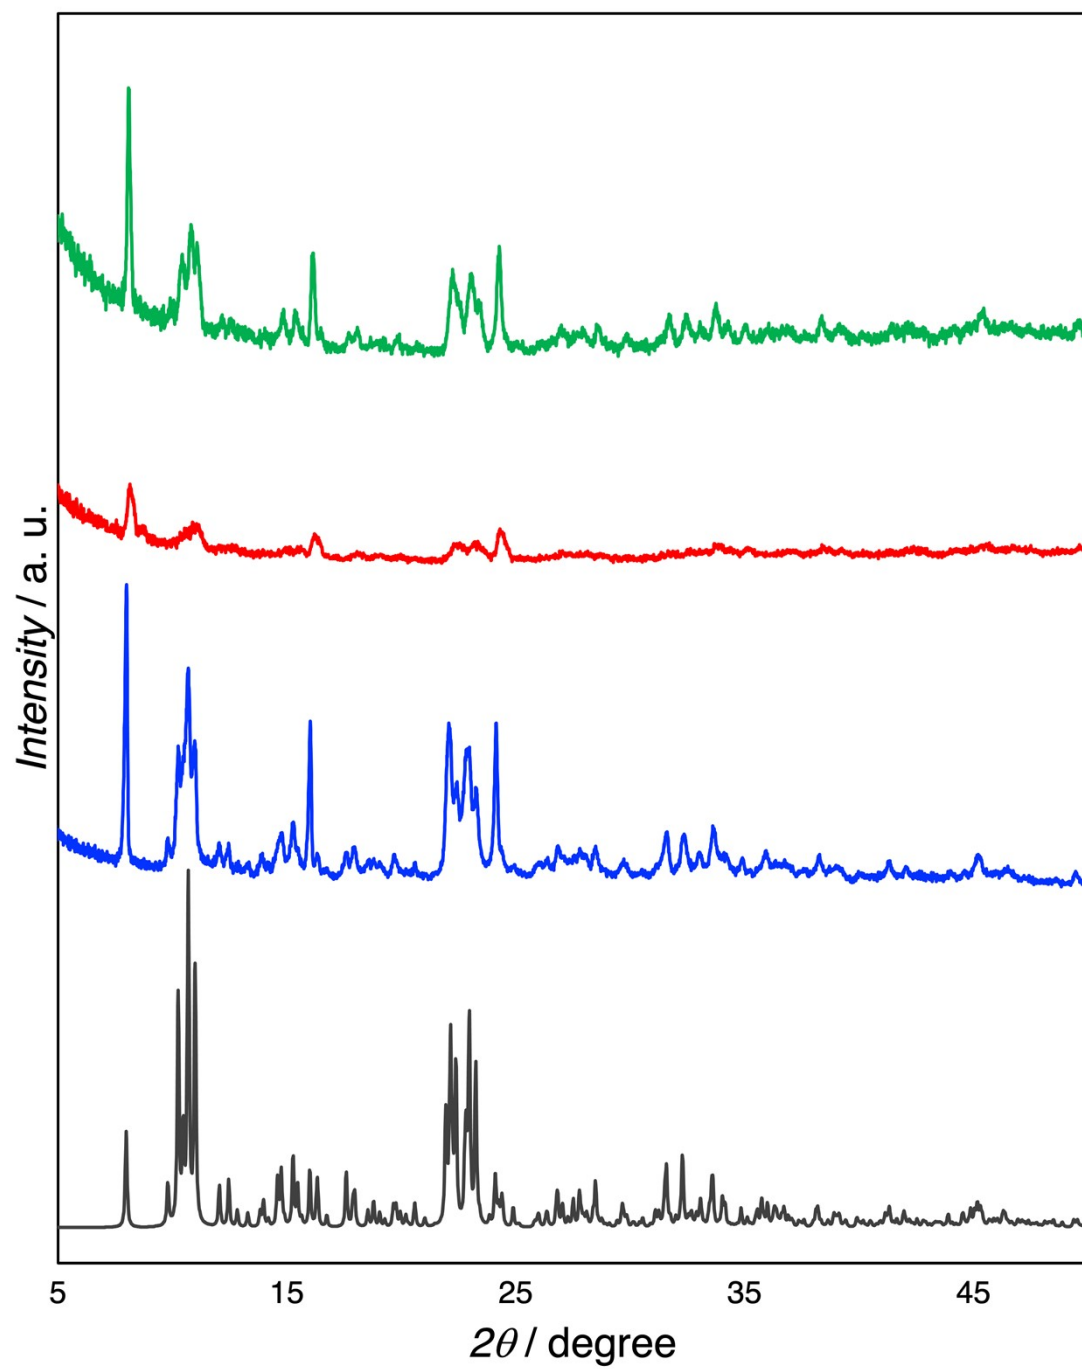

Fig.S12 PXR D patterns of **Fe-B**. Black) simulation from the single crystal, blue) as-synthesis, red) dehydration, green) rehydration.

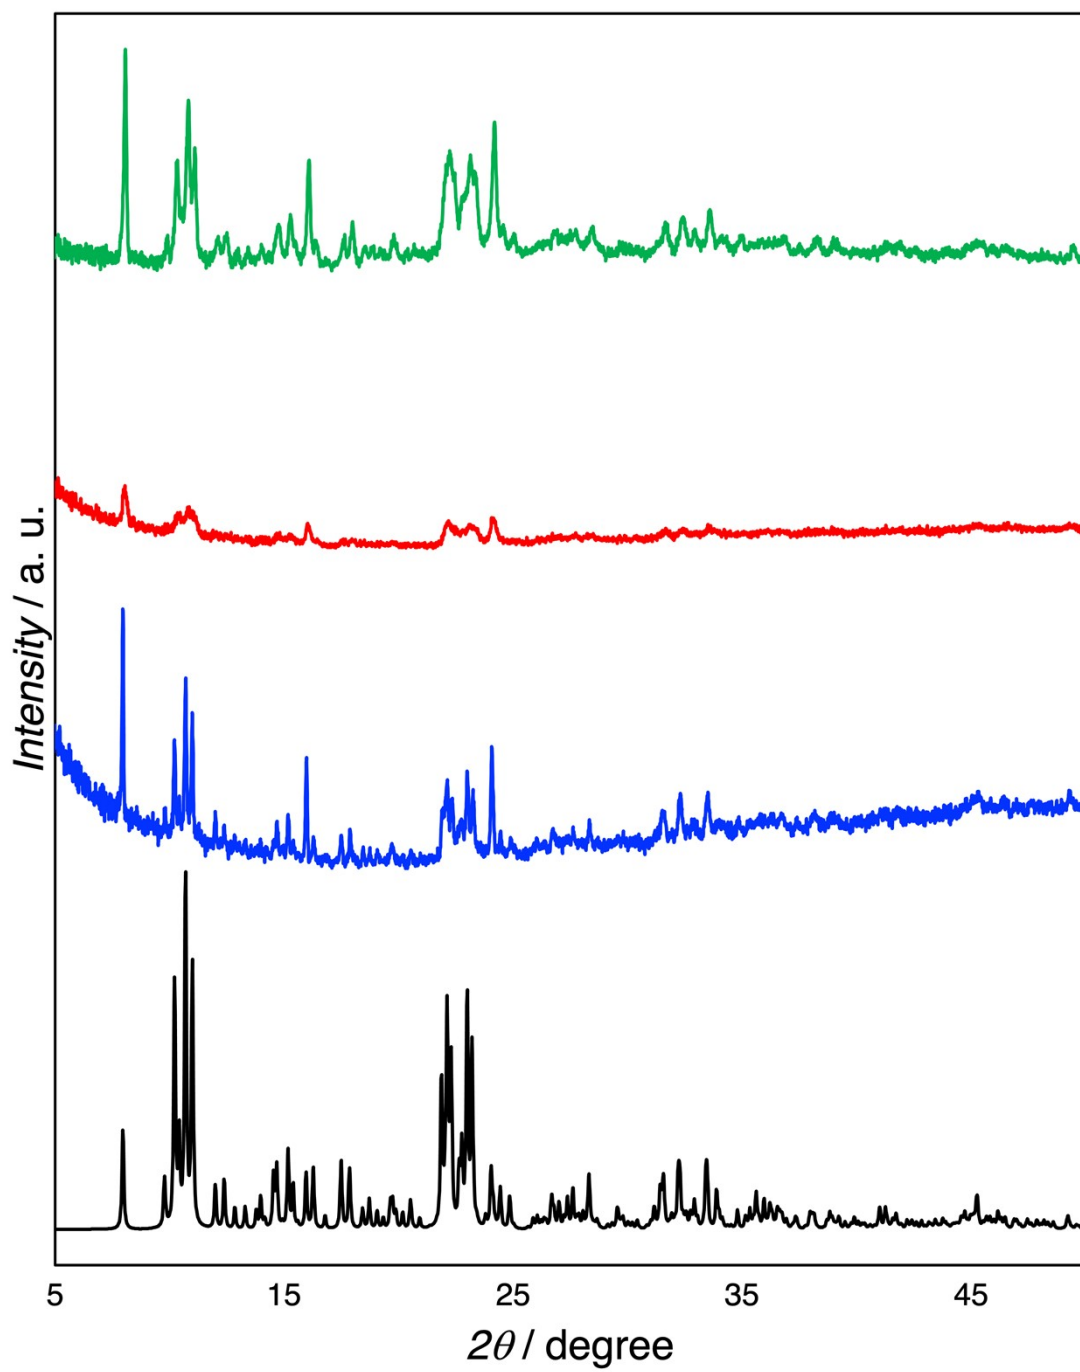

Fig.S13 PXR D patterns of **Co-B**. Black) simulation from the single crystal, blue) as-synthesis, red) dehydration, green) rehydration.

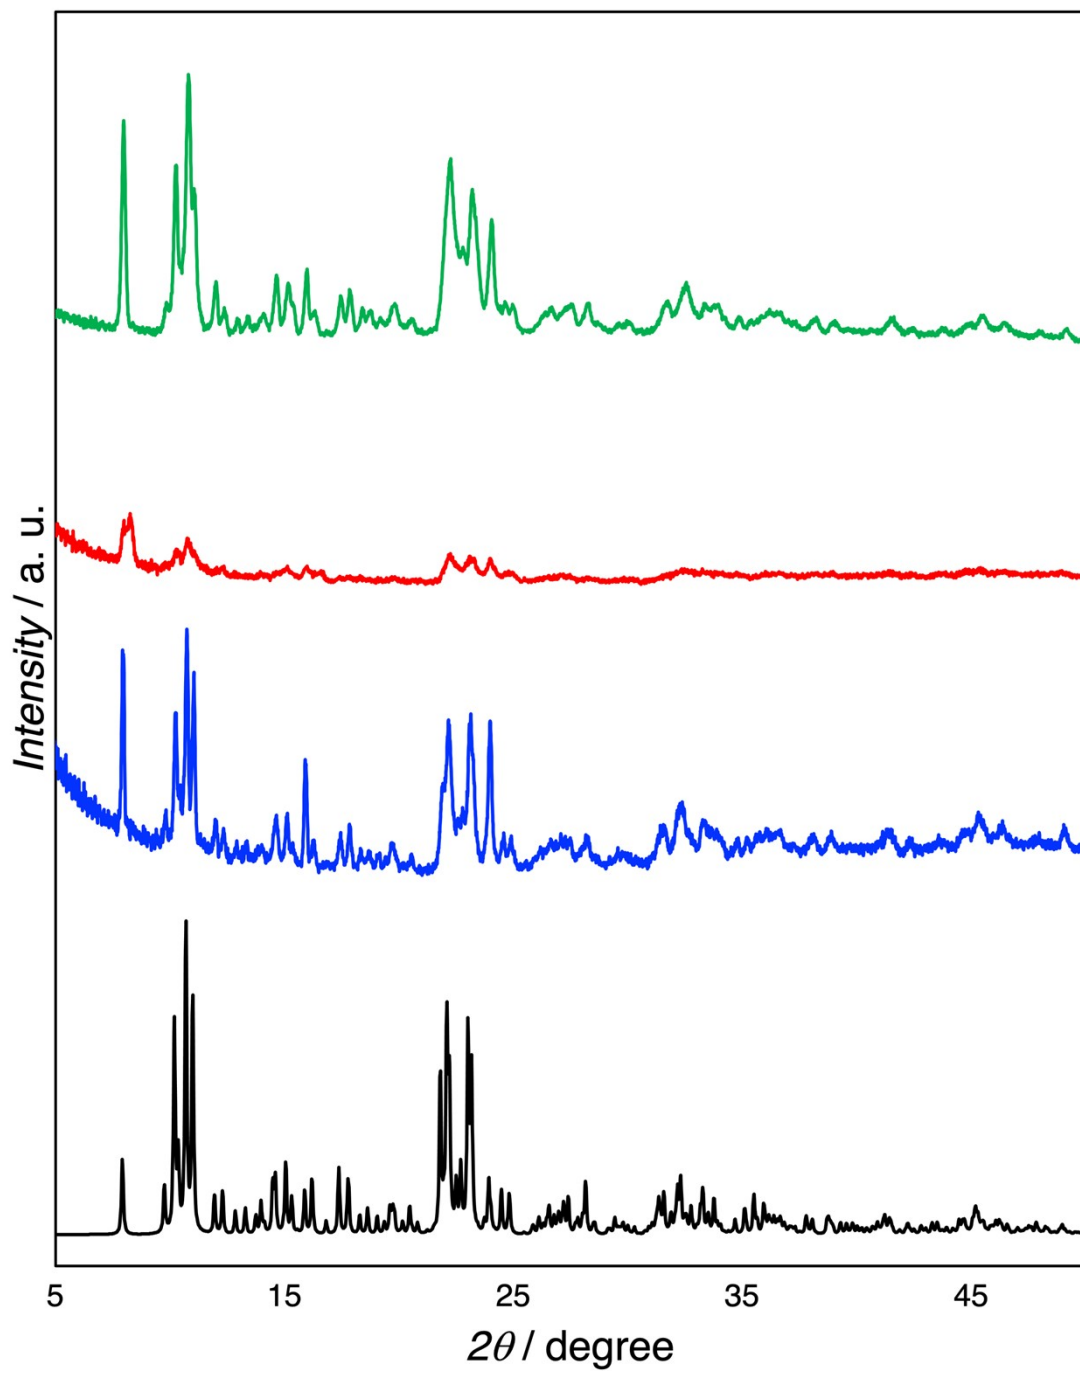

Fig.S14 PXR D patterns of Ni-B. Black) simulation from the single crystal, blue) as-synthesis, red) dehydration, green) rehydration.

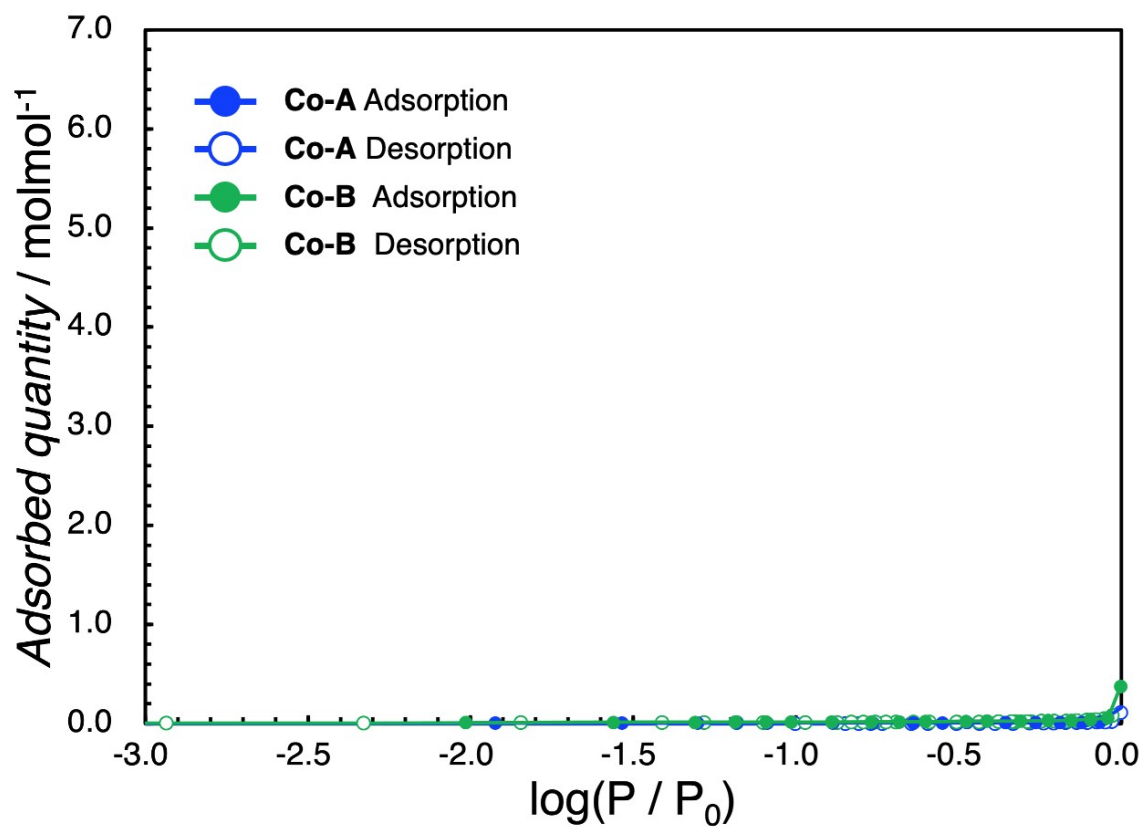

Fig. S15 N<sub>2</sub> adsorption isotherms at 77 K for Co-A (blue) and Co-B (green). Filled circles indicate adsorption and open circles indicate desorption.

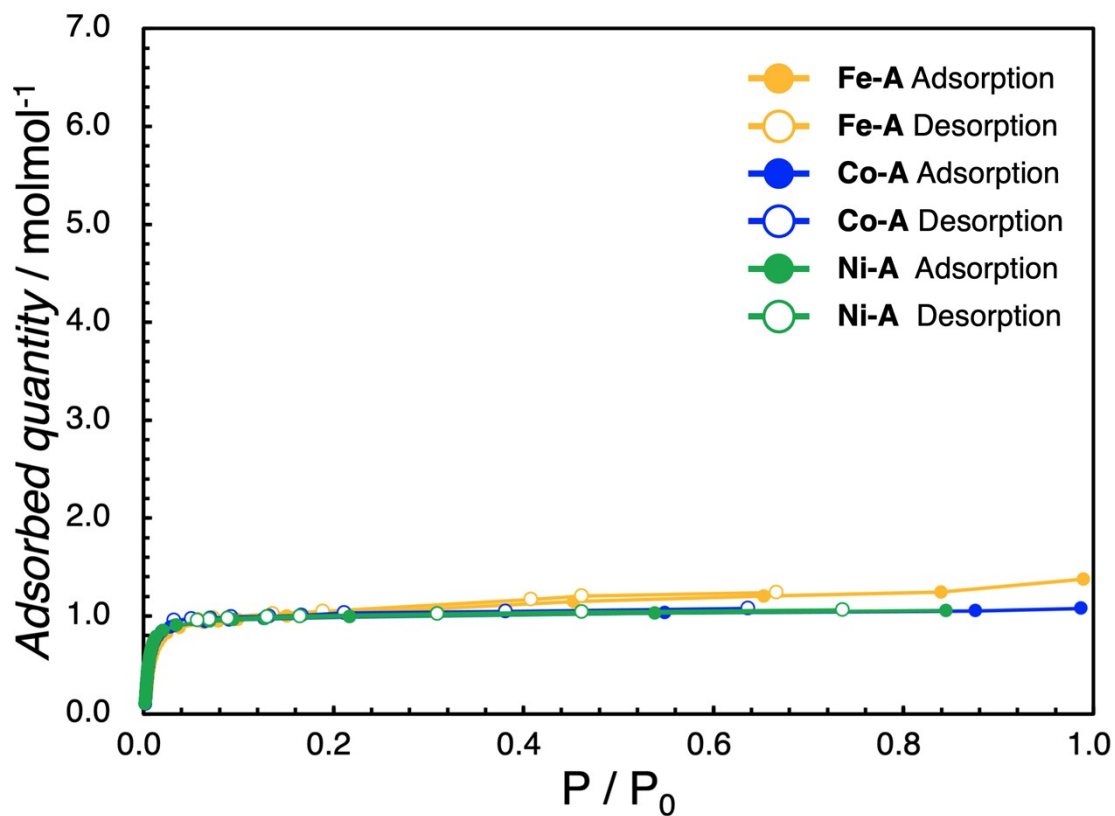

Fig. S16 Water adsorption isotherms at 298 K for Fe-A (yellow), Co-A (blue), and Ni-A (green). Filled circles indicate adsorption and open circles indicate desorption.



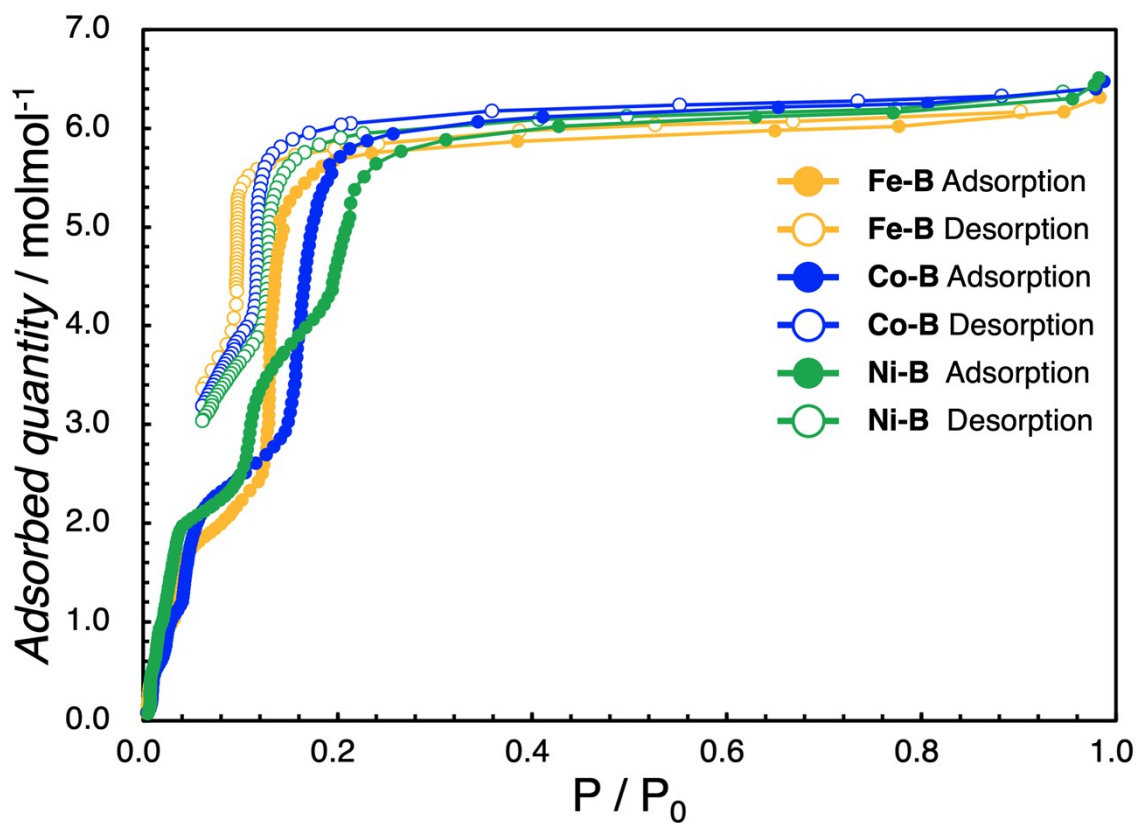

Fig. S17 Water adsorption isotherms at 298 K for **Fe-B** (yellow), **Co-B** (blue), and **Ni-B** (green). Filled circles indicate adsorption and open circles indicate desorption.

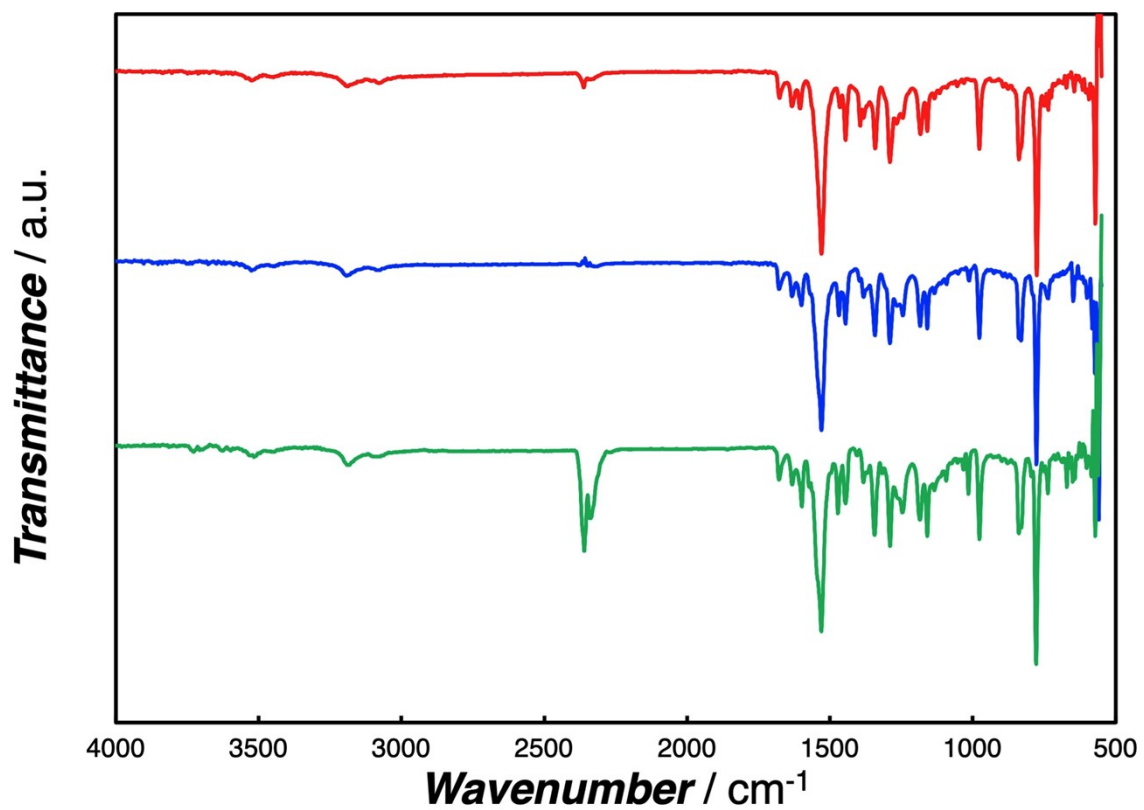

Fig. S18 FT-IR Spectra for Fe-A (red), Co-A (blue), and Ni-A (green).

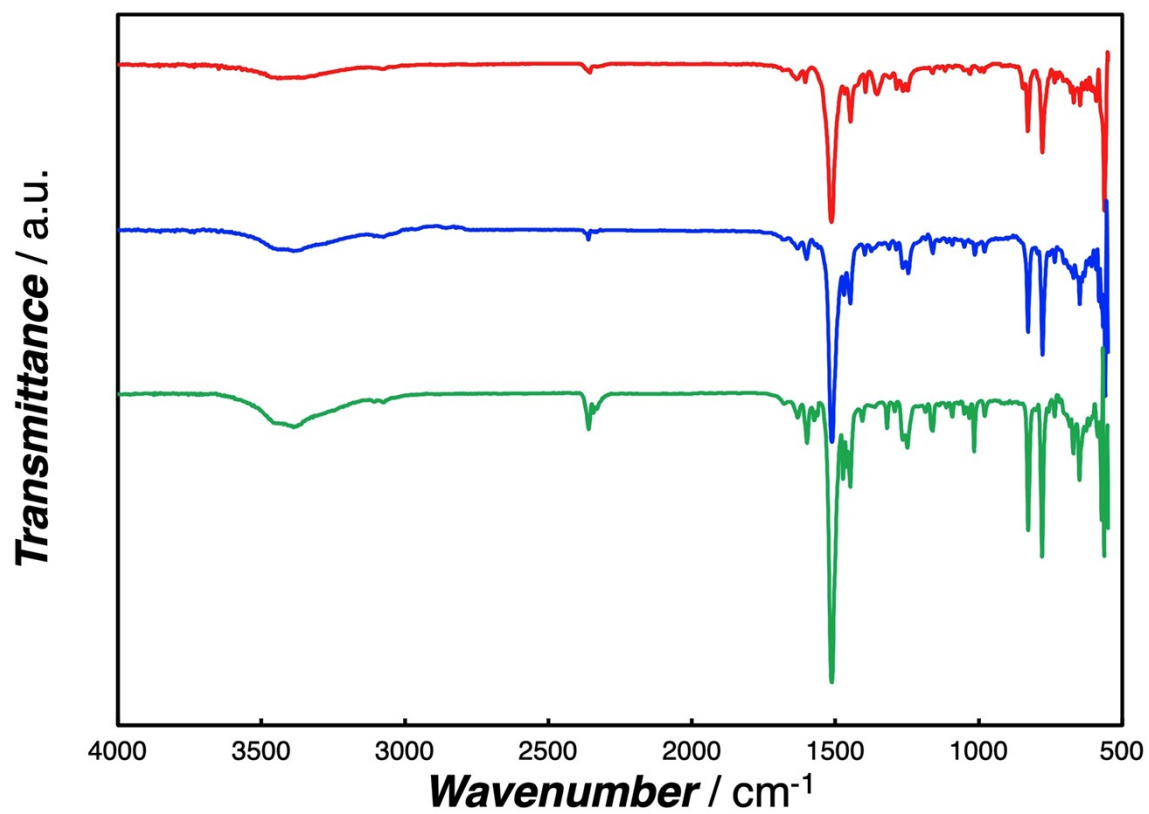

Fig. S19 FT-IR Spectra for Fe-B (red), Co-B (blue), and Ni-B (green).

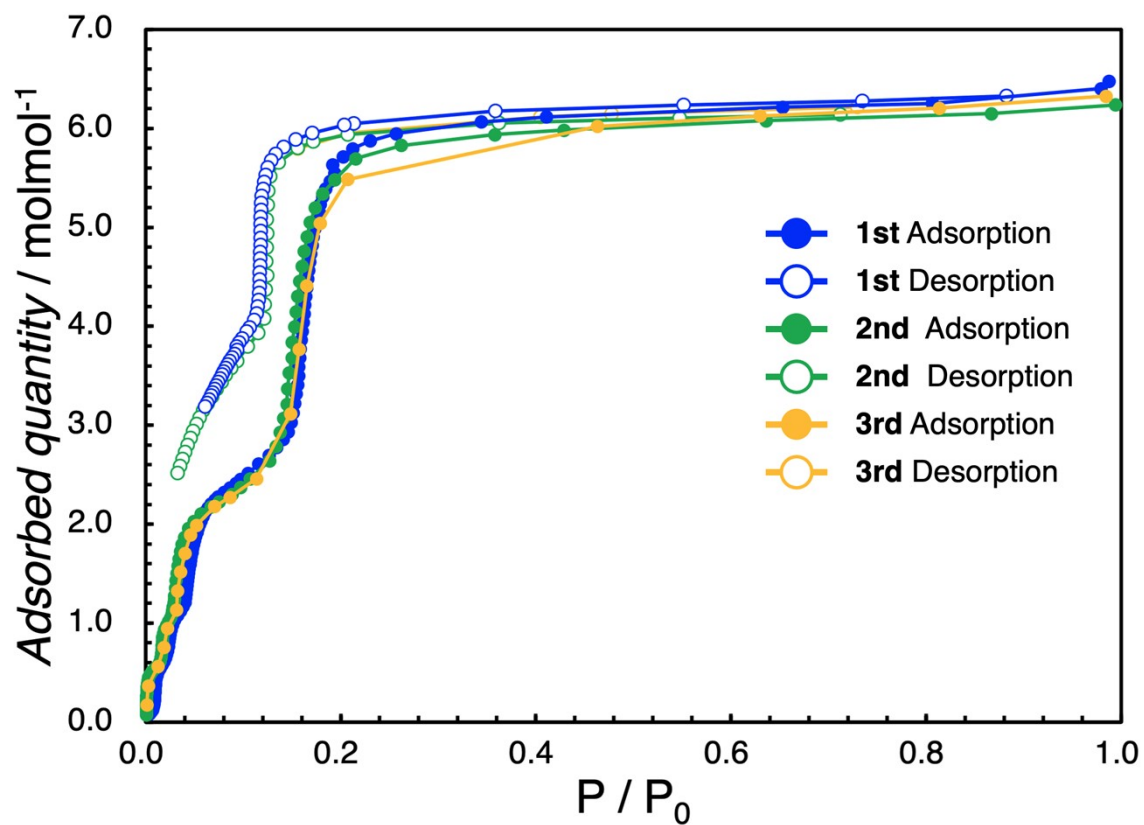

Fig. S20 Cyclic water adsorption isotherms at 298 K for **Co-B**. Filled circles indicate adsorption and open circles indicate desorption.

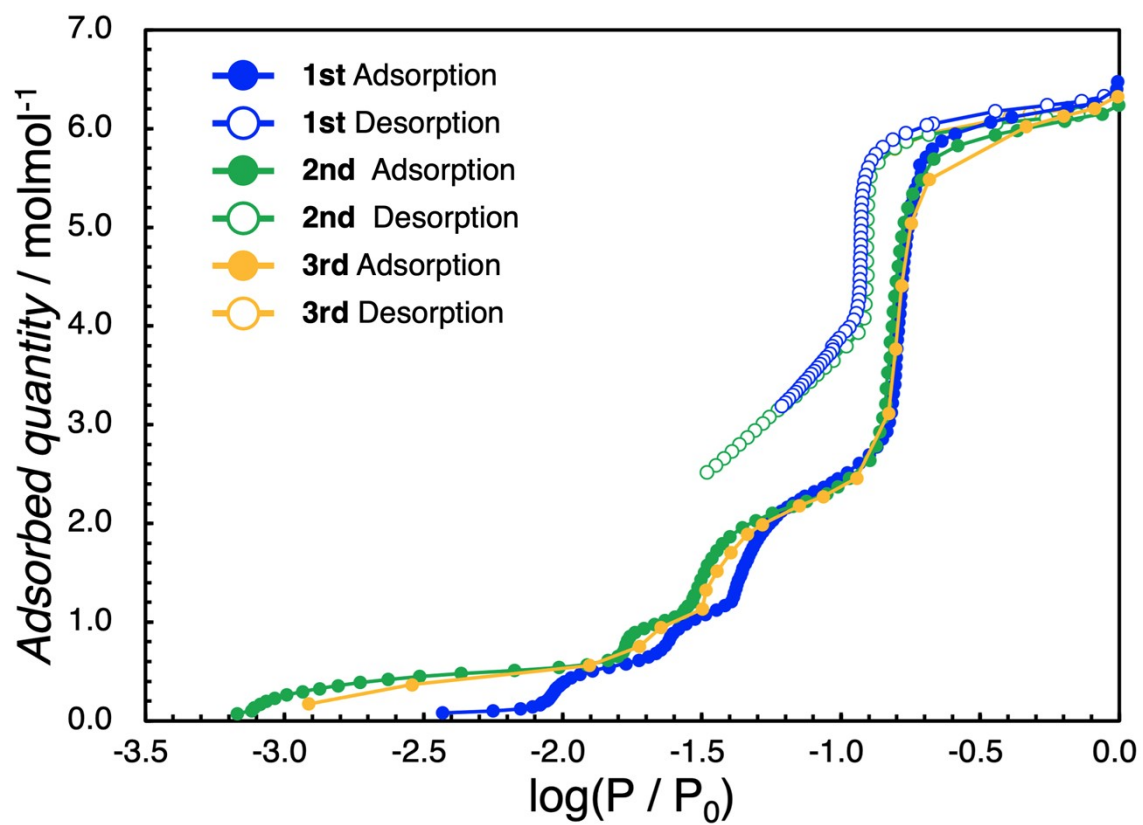

Fig. S21 Cyclic water adsorption isotherms represented in logarithmic form at 298 K for **Co-B**. Filled circles indicate adsorption and open circles indicate desorption.
